# Supplementary material for: Genetic Evidence for Repurposing of GLP1R (Glucagon‐Like Peptide‐1 Receptor) Agonists to Prevent Heart Failure
Source: PubMed Central journal article supplement (PMC8403330; doi:10.1161/jaha.120.020331), 2021-06-29
Supplement: JAH3-10-e020331-s001.pdf [file JAH3-10-e020331-s001.pdf]

# **SUPPLEMENTAL MATERIAL**

**Table S1. Genetic proxies for GLP1R agonism, and estimates for their association with glycated hemoglobin, type 2 diabetes, heart failure, and left ventricular ejection fraction.**

| SNP         | Chr | Position | EA | OA | EAF  | Glycated hemoglobin |       |                       | Type 2 diabetes |       |                        | Heart failure |       |                       | Left ventricular ejection fraction |       |                      |
|-------------|-----|----------|----|----|------|---------------------|-------|-----------------------|-----------------|-------|------------------------|---------------|-------|-----------------------|------------------------------------|-------|----------------------|
|             |     |          |    |    |      | Beta                | SE    | P                     | Beta            | SE    | P                      | Beta          | SE    | P                     | Beta                               | SE    | P                    |
| rs10305420* | 6   | 39016636 | T  | C  | 0.39 | -0.051              | 0.016 | 1.30x10 <sup>-3</sup> | -0.032          | 0.004 | 5.11x10 <sup>-14</sup> | -0.024        | 0.008 | 2.63x10 <sup>-3</sup> | -0.009                             | 0.011 | 4.1x10 <sup>-1</sup> |
| rs75151020  | 6   | 39031592 | C  | A  | 0.09 | 0.119               | 0.026 | 7.08x10 <sup>-6</sup> | 0.041           | 0.007 | 1.37x10 <sup>-9</sup>  | -0.022        | 0.013 | 1.04x10 <sup>-1</sup> | 0.040                              | 0.019 | 3.4x10 <sup>-2</sup> |
| rs2268647   | 6   | 39043178 | T  | C  | 0.52 | 0.066               | 0.015 | 1.51x10 <sup>-5</sup> | 0.021           | 0.004 | 4.95x10 <sup>-8</sup>  | 0.019         | 0.007 | 1.12x10 <sup>-2</sup> | 0.008                              | 0.011 | 4.4x10 <sup>-1</sup> |

Chr: chromosome; EA: effect allele; EAF: effect allele frequency; OA: other allele; SE: standard error; SNP: single nucleotide polymorphism. \*: missense variant

**Table S2. Linkage disequilibrium  $r^2$  values for variants used as proxies for GLP1R agonism.**

| <b>rsID</b>       | <b>rs10305420</b> | <b>rs75151020</b> | <b>rs2268647</b> |
|-------------------|-------------------|-------------------|------------------|
| <b>rs10305420</b> | 1.00              | 0.01              | 0.00             |
| <b>rs75151020</b> | 0.01              | 1.00              | 0.07             |
| <b>rs2268647</b>  | 0.00              | 0.06              | 1.00             |

$r^2$  values were obtained using linkage disequilibrium data from the European subsample of the 1000 Genomes project (<https://ldlink.nci.nih.gov/?tab=ldmatrix>).

**Table S3. Genetic proxies for GLP1R agonism, and estimates for their association with gene expression in the GTEx v8 database.**

| <b>Gene Symbol</b> | <b>SNP</b> | <b>P-Value</b> | <b>NES</b> | <b>Directional concordance with glycated hemoglobin</b> | <b>Tissue</b>                  |
|--------------------|------------|----------------|------------|---------------------------------------------------------|--------------------------------|
| GLP1R              | rs10305420 | 2.10E-09       | 0.23       | Yes                                                     | Nerve - Tibial                 |
| GLP1R              | rs10305420 | 3.80E-06       | 0.26       | Yes                                                     | Adipose - Visceral (Omentum)   |
| GLP1R              | rs10305420 | 4.10E-06       | 0.25       | Yes                                                     | Thyroid                        |
| GLP1R              | rs10305420 | 2.30E-05       | 0.24       | Yes                                                     | Pancreas                       |
| GLP1R              | rs2268647  | 1.00E-09       | 0.31       | No                                                      | Heart - Left Ventricle         |
| GLP1R              | rs2268647  | 2.10E-07       | 0.23       | No                                                      | Heart - Atrial Appendage       |
| GLP1R              | rs2268647  | 3.40E-07       | -0.33      | Yes                                                     | Stomach                        |
| GLP1R              | rs2268647  | 2.10E-06       | -0.27      | Yes                                                     | Pancreas                       |
| GLP1R              | rs2268647  | 1.60E-05       | -0.23      | Yes                                                     | Thyroid                        |
| ANKRD18EP          | rs2268647  | 2.20E-05       | -0.12      | Yes                                                     | Skin - Sun Exposed (Lower leg) |

rs75151020 did not significantly influence gene expression in any of the tissues in the GTEx database. Variants were annotated as directionally concordant if they were associated with lower glycated hemoglobin and higher expression of *GLP1R* (or vice versa). NES: normalized effect size; SNP: single nucleotide polymorphism.

**Table S4. Genetic proxies for glycemic control by any mechanism, and estimates for their association with glycosylated hemoglobin (for the outcome of heart failure).**

| SNP         | Chromosome | Position  | Effect allele | Other allele | EAF  | Beta   | SE    |
|-------------|------------|-----------|---------------|--------------|------|--------|-------|
| rs2482506   | 10         | 104563743 | G             | C            | 0.25 | -0.053 | 0.018 |
| rs79364741  | 10         | 114666651 | T             | C            | 0.01 | -0.164 | 0.073 |
| rs11196174  | 10         | 114734096 | G             | A            | 0.29 | 0.252  | 0.017 |
| rs149692182 | 10         | 114752674 | T             | C            | 0.02 | 0.309  | 0.053 |
| rs35676242  | 10         | 114757314 | A             | C            | 0.05 | 0.230  | 0.036 |
| rs11257655  | 10         | 12307894  | T             | C            | 0.21 | 0.219  | 0.019 |
| rs946859    | 10         | 13565429  | A             | G            | 0.47 | -0.075 | 0.015 |
| rs3122231   | 10         | 44027356  | C             | T            | 0.65 | 0.050  | 0.016 |
| rs113899647 | 10         | 64850074  | T             | C            | 0.03 | -0.189 | 0.044 |
| rs949693    | 10         | 70354574  | A             | G            | 0.61 | -0.050 | 0.016 |
| rs11592899  | 10         | 71333783  | A             | G            | 0.34 | -0.055 | 0.016 |
| rs2812535   | 10         | 71456857  | A             | G            | 0.62 | 0.069  | 0.016 |
| rs697239    | 10         | 80947438  | C             | T            | 0.46 | -0.105 | 0.015 |
| rs11201992  | 10         | 88117318  | A             | C            | 0.46 | -0.038 | 0.015 |
| rs1111875   | 10         | 94462882  | T             | C            | 0.41 | -0.181 | 0.016 |
| rs66536955  | 10         | 94737667  | C             | T            | 0.26 | 0.044  | 0.017 |
| rs34041345  | 10         | 99174580  | G             | T            | 0.26 | 0.060  | 0.018 |
| rs529623    | 11         | 117693255 | C             | T            | 0.52 | -0.059 | 0.015 |
| rs10893830  | 11         | 128044159 | T             | C            | 0.13 | -0.058 | 0.023 |
| rs10750397  | 11         | 128234144 | G             | A            | 0.72 | -0.040 | 0.017 |
| rs67232546  | 11         | 128398938 | T             | C            | 0.21 | 0.067  | 0.019 |
| rs117316450 | 11         | 14518419  | G             | C            | 0.02 | 0.316  | 0.054 |
| rs757110    | 11         | 17418477  | A             | C            | 0.64 | -0.112 | 0.016 |
| rs11042987  | 11         | 2201059   | A             | C            | 0.58 | -0.034 | 0.016 |
| rs10831668  | 11         | 2288412   | T             | C            | 0.02 | 0.234  | 0.060 |
| rs231362    | 11         | 2691471   | G             | A            | 0.52 | 0.120  | 0.015 |
| rs10767659  | 11         | 27686196  | T             | G            | 0.67 | -0.041 | 0.016 |

|            |    |           |   |   |      |        |       |
|------------|----|-----------|---|---|------|--------|-------|
| rs60808706 | 11 | 2857233   | A | G | 0.05 | -0.227 | 0.035 |
| rs2289488  | 11 | 2892955   | C | G | 0.40 | 0.040  | 0.016 |
| rs62618693 | 11 | 32956492  | T | C | 0.05 | -0.144 | 0.037 |
| rs523472   | 11 | 35031668  | A | G | 0.72 | -0.056 | 0.017 |
| rs3816605  | 11 | 47857253  | C | T | 0.45 | -0.080 | 0.015 |
| rs7483027  | 11 | 58128015  | C | T | 0.38 | -0.061 | 0.016 |
| rs174541   | 11 | 61565908  | C | T | 0.36 | -0.098 | 0.016 |
| rs1143756  | 11 | 65299595  | G | A | 0.29 | 0.100  | 0.017 |
| rs3918296  | 11 | 69459036  | G | C | 0.03 | -0.249 | 0.049 |
| rs11602873 | 11 | 72460762  | T | A | 0.16 | -0.187 | 0.021 |
| rs11236524 | 11 | 75464344  | C | T | 0.09 | 0.069  | 0.027 |
| rs4945090  | 11 | 76205018  | A | T | 0.60 | 0.036  | 0.016 |
| rs12802861 | 11 | 8387806   | T | C | 0.28 | -0.052 | 0.017 |
| rs10830963 | 11 | 92708710  | G | C | 0.28 | 0.297  | 0.017 |
| rs3020069  | 11 | 93057087  | A | G | 0.68 | 0.093  | 0.016 |
| rs1426371  | 12 | 108629780 | A | G | 0.26 | -0.074 | 0.018 |
| rs79310463 | 12 | 118406696 | T | C | 0.13 | 0.104  | 0.023 |
| rs56348580 | 12 | 121432117 | C | G | 0.31 | -0.037 | 0.017 |
| rs7975763  | 12 | 123604053 | T | C | 0.20 | -0.057 | 0.019 |
| rs11614914 | 12 | 133070294 | T | C | 0.33 | 0.078  | 0.016 |
| rs12828318 | 12 | 133766122 | G | A | 0.18 | -0.057 | 0.020 |
| rs10841886 | 12 | 21864377  | C | T | 0.23 | -0.082 | 0.018 |
| rs1480029  | 12 | 26356032  | A | G | 0.46 | 0.042  | 0.015 |
| rs3751239  | 12 | 27963676  | G | C | 0.20 | -0.160 | 0.019 |
| rs11063018 | 12 | 4288001   | C | T | 0.17 | 0.067  | 0.020 |
| rs74862545 | 12 | 4365572   | T | C | 0.02 | -0.279 | 0.052 |
| rs76895963 | 12 | 4384844   | G | T | 0.02 | -1.037 | 0.059 |
| rs2732469  | 12 | 48712932  | A | T | 0.43 | -0.258 | 0.015 |
| rs61937817 | 12 | 57212823  | G | T | 0.11 | 0.060  | 0.024 |
| rs11173646 | 12 | 61250814  | T | A | 0.82 | -0.046 | 0.020 |
| rs2257883  | 12 | 66216162  | A | G | 0.13 | 0.150  | 0.023 |
| rs12371967 | 12 | 66346714  | C | T | 0.17 | -0.043 | 0.020 |

|             |    |           |   |   |      |        |       |
|-------------|----|-----------|---|---|------|--------|-------|
| rs10879261  | 12 | 71520761  | G | T | 0.41 | 0.068  | 0.016 |
| rs11108094  | 12 | 95928113  | A | C | 0.07 | 0.099  | 0.030 |
| rs6538805   | 12 | 97849120  | C | T | 0.39 | -0.076 | 0.016 |
| rs9587811   | 13 | 109946882 | A | C | 0.41 | -0.056 | 0.016 |
| rs314879    | 13 | 23309382  | T | C | 0.79 | -0.069 | 0.019 |
| rs34584161  | 13 | 26776999  | G | A | 0.24 | -0.063 | 0.018 |
| rs380854    | 13 | 33574631  | A | G | 0.58 | -0.058 | 0.016 |
| rs9316500   | 13 | 51094114  | G | T | 0.29 | -0.067 | 0.017 |
| rs7991679   | 13 | 58691107  | A | T | 0.16 | -0.081 | 0.021 |
| rs1215451   | 13 | 80715893  | A | G | 0.29 | -0.131 | 0.017 |
| rs112324411 | 14 | 101258584 | T | C | 0.07 | -0.101 | 0.032 |
| rs2295388   | 14 | 101309759 | A | G | 0.22 | -0.073 | 0.019 |
| rs4906272   | 14 | 103376031 | T | C | 0.16 | 0.046  | 0.021 |
| rs12883788  | 14 | 33303540  | T | C | 0.46 | 0.060  | 0.015 |
| rs7147483   | 14 | 38804675  | C | T | 0.25 | -0.158 | 0.018 |
| rs723355    | 14 | 47304091  | A | G | 0.50 | -0.034 | 0.015 |
| rs4902002   | 14 | 61229411  | A | G | 0.71 | -0.034 | 0.017 |
| rs242105    | 14 | 69459229  | C | A | 0.28 | 0.062  | 0.017 |
| rs7156625   | 14 | 79942647  | A | G | 0.22 | 0.037  | 0.019 |
| rs8010382   | 14 | 91963722  | G | A | 0.41 | 0.046  | 0.016 |
| rs8043085   | 15 | 38828140  | T | G | 0.23 | 0.071  | 0.018 |
| rs11856877  | 15 | 40620560  | G | A | 0.11 | 0.071  | 0.024 |
| rs1473781   | 15 | 41818917  | A | G | 0.35 | 0.067  | 0.016 |
| rs149336329 | 15 | 52587740  | T | G | 0.05 | -0.272 | 0.037 |
| rs7163757   | 15 | 62391608  | T | C | 0.43 | -0.042 | 0.015 |
| rs7178762   | 15 | 63871292  | T | C | 0.55 | -0.057 | 0.015 |
| rs9479      | 15 | 74328576  | G | A | 0.49 | 0.052  | 0.015 |
| rs8033589   | 15 | 75596685  | A | G | 0.76 | 0.058  | 0.018 |
| rs12910361  | 15 | 77782335  | G | A | 0.71 | 0.161  | 0.017 |
| rs893617    | 15 | 90381278  | T | C | 0.72 | -0.136 | 0.017 |
| rs2290202   | 15 | 91512267  | T | G | 0.13 | 0.085  | 0.023 |
| rs9927842   | 16 | 15153717  | C | T | 0.84 | -0.056 | 0.021 |

|             |    |          |   |   |      |        |       |
|-------------|----|----------|---|---|------|--------|-------|
| rs8056890   | 16 | 28897452 | A | G | 0.36 | 0.105  | 0.016 |
| rs8054556   | 16 | 29958216 | A | G | 0.47 | 0.077  | 0.015 |
| rs55857387  | 16 | 300388   | C | T | 0.20 | -0.142 | 0.019 |
| rs8061528   | 16 | 3656482  | T | C | 0.21 | 0.092  | 0.019 |
| rs2024449   | 16 | 53494617 | C | T | 0.44 | -0.056 | 0.015 |
| rs1421085   | 16 | 53800954 | C | T | 0.40 | 0.154  | 0.016 |
| rs56125990  | 16 | 69742387 | G | A | 0.15 | 0.065  | 0.021 |
| rs4788815   | 16 | 71634811 | T | A | 0.66 | 0.056  | 0.016 |
| rs72802365  | 16 | 75246035 | C | G | 0.08 | -0.163 | 0.029 |
| rs2966117   | 16 | 81599271 | T | G | 0.48 | 0.059  | 0.015 |
| rs11117364  | 16 | 88132199 | G | A | 0.68 | 0.066  | 0.017 |
| rs9937296   | 16 | 88554480 | C | T | 0.86 | 0.069  | 0.023 |
| rs66461358  | 16 | 89535257 | C | T | 0.15 | 0.060  | 0.021 |
| rs12934854  | 16 | 950028   | A | G | 0.17 | 0.043  | 0.020 |
| rs925095    | 17 | 17344653 | T | C | 0.39 | -0.075 | 0.016 |
| rs2297508   | 17 | 17715317 | G | C | 0.65 | -0.150 | 0.016 |
| rs117642733 | 17 | 21284910 | T | C | 0.05 | 0.107  | 0.039 |
| rs9913225   | 17 | 27570622 | A | G | 0.58 | -0.075 | 0.016 |
| rs1109442   | 17 | 34862220 | C | T | 0.47 | 0.071  | 0.015 |
| rs3110641   | 17 | 36047417 | G | A | 0.78 | 0.091  | 0.019 |
| rs11651755  | 17 | 36099840 | T | C | 0.51 | -0.124 | 0.015 |
| rs3786017   | 17 | 3830340  | C | T | 0.11 | 0.054  | 0.025 |
| rs8071043   | 17 | 3988451  | C | T | 0.33 | 0.066  | 0.016 |
| rs1905339   | 17 | 40582296 | C | T | 0.34 | 0.097  | 0.016 |
| rs35895680  | 17 | 47060322 | A | C | 0.33 | -0.089 | 0.016 |
| rs366577    | 17 | 4854480  | T | C | 0.60 | -0.051 | 0.016 |
| rs57767539  | 17 | 62203059 | A | G | 0.07 | 0.136  | 0.031 |
| rs11658220  | 17 | 65646092 | A | G | 0.10 | 0.100  | 0.025 |
| rs12603589  | 17 | 65825248 | C | T | 0.19 | 0.103  | 0.020 |
| rs7224711   | 17 | 76772288 | T | C | 0.53 | -0.069 | 0.015 |
| rs303760    | 18 | 21083738 | T | C | 0.35 | 0.052  | 0.016 |
| rs16965062  | 18 | 31581247 | T | C | 0.43 | 0.034  | 0.015 |



|             |    |           |   |   |      |        |       |
|-------------|----|-----------|---|---|------|--------|-------|
| rs7227272   | 18 | 36746623  | A | G | 0.10 | -0.062 | 0.026 |
| rs410150    | 18 | 40066006  | T | C | 0.80 | -0.047 | 0.019 |
| rs17596995  | 18 | 53166594  | A | G | 0.20 | -0.049 | 0.019 |
| rs1517037   | 18 | 56878274  | T | C | 0.19 | -0.093 | 0.020 |
| rs6567160   | 18 | 57829135  | C | T | 0.23 | 0.097  | 0.018 |
| rs74625348  | 18 | 60846430  | C | G | 0.23 | -0.044 | 0.019 |
| rs12963820  | 18 | 63426213  | A | T | 0.27 | 0.034  | 0.017 |
| rs7240767   | 18 | 7070642   | C | T | 0.39 | 0.063  | 0.016 |
| rs6565922   | 18 | 74558999  | T | C | 0.38 | 0.078  | 0.016 |
| rs9384      | 19 | 13010643  | T | G | 0.38 | -0.107 | 0.016 |
| rs10404726  | 19 | 18834514  | T | C | 0.47 | -0.035 | 0.015 |
| rs58542926  | 19 | 19379549  | T | C | 0.08 | 0.139  | 0.029 |
| rs924150    | 19 | 31829903  | C | A | 0.39 | -0.087 | 0.016 |
| rs4805881   | 19 | 33896432  | C | A | 0.67 | -0.077 | 0.016 |
| rs429358    | 19 | 45411941  | C | T | 0.16 | -0.142 | 0.021 |
| rs8107527   | 19 | 46158417  | A | G | 0.28 | 0.105  | 0.017 |
| rs9304665   | 19 | 47602577  | A | T | 0.77 | 0.103  | 0.018 |
| rs2115107   | 19 | 7968168   | A | G | 0.38 | 0.069  | 0.016 |
| rs116843064 | 19 | 8429323   | A | G | 0.02 | -0.150 | 0.055 |
| rs7554251   | 1  | 11317932  | C | T | 0.73 | 0.036  | 0.017 |
| rs1127215   | 1  | 117532790 | T | C | 0.42 | -0.065 | 0.016 |
| rs66464442  | 1  | 118171801 | A | C | 0.32 | 0.121  | 0.016 |
| rs1493694   | 1  | 120526982 | T | C | 0.11 | 0.146  | 0.025 |
| rs145904381 | 1  | 151017991 | C | T | 0.01 | -0.266 | 0.071 |
| rs2297607   | 1  | 154320942 | G | A | 0.24 | 0.051  | 0.018 |
| rs6696888   | 1  | 155508882 | A | G | 0.68 | -0.048 | 0.016 |
| rs7546252   | 1  | 172368310 | G | A | 0.56 | -0.092 | 0.015 |
| rs539515    | 1  | 177889025 | C | A | 0.21 | 0.049  | 0.019 |
| rs2816177   | 1  | 179248952 | G | A | 0.41 | 0.049  | 0.016 |
| rs41304257  | 1  | 201849926 | G | A | 0.28 | -0.042 | 0.017 |
| rs61817176  | 1  | 206621028 | C | A | 0.52 | -0.074 | 0.015 |
| rs10916780  | 1  | 20707153  | G | A | 0.20 | -0.045 | 0.019 |

|            |    |           |   |   |      |        |       |
|------------|----|-----------|---|---|------|--------|-------|
| rs340874   | 1  | 214159256 | C | T | 0.57 | 0.166  | 0.015 |
| rs1337101  | 1  | 219726100 | T | G | 0.32 | -0.095 | 0.016 |
| rs348330   | 1  | 229672955 | A | G | 0.63 | -0.119 | 0.016 |
| rs10925635 | 1  | 235573486 | C | A | 0.64 | 0.046  | 0.016 |
| rs17261915 | 1  | 26756856  | C | T | 0.25 | 0.074  | 0.018 |
| rs3753693  | 1  | 29060898  | T | C | 0.41 | -0.066 | 0.016 |
| rs61779284 | 1  | 39855177  | A | G | 0.21 | 0.130  | 0.019 |
| rs79090772 | 1  | 51209148  | C | T | 0.09 | -0.219 | 0.027 |
| rs2269247  | 1  | 64107284  | T | C | 0.18 | -0.056 | 0.020 |
| rs11583755 | 1  | 6672729   | C | A | 0.36 | 0.107  | 0.016 |
| rs2613499  | 1  | 72751552  | G | A | 0.19 | -0.052 | 0.019 |
| rs10159026 | 1  | 96404462  | T | C | 0.25 | -0.062 | 0.018 |
| rs6137042  | 20 | 2100095   | A | G | 0.20 | -0.050 | 0.019 |
| rs7274134  | 20 | 22428284  | T | C | 0.25 | -0.062 | 0.018 |
| rs6059662  | 20 | 32675727  | G | A | 0.65 | 0.037  | 0.016 |
| rs2038457  | 20 | 42239145  | G | A | 0.81 | 0.041  | 0.020 |
| rs12625671 | 20 | 42994812  | C | T | 0.11 | 0.118  | 0.025 |
| rs6066138  | 20 | 45594711  | A | G | 0.28 | -0.135 | 0.017 |
| rs6021276  | 20 | 50155386  | C | T | 0.64 | -0.074 | 0.016 |
| rs865034   | 20 | 51261615  | C | T | 0.66 | 0.040  | 0.016 |
| rs4810145  | 20 | 57396495  | C | T | 0.52 | 0.068  | 0.015 |
| rs6011155  | 20 | 62450664  | C | T | 0.37 | -0.074 | 0.016 |
| rs2240716  | 22 | 19969696  | T | C | 0.30 | 0.074  | 0.017 |
| rs56392746 | 22 | 30451688  | A | G | 0.09 | -0.138 | 0.026 |
| rs75307421 | 22 | 32203334  | A | G | 0.02 | 0.151  | 0.061 |
| rs138771   | 22 | 35705359  | G | A | 0.81 | -0.055 | 0.020 |
| rs1801645  | 22 | 50356850  | T | C | 0.74 | -0.059 | 0.018 |
| rs34506349 | 2  | 100598726 | A | G | 0.04 | -0.099 | 0.038 |
| rs79950062 | 2  | 111940612 | C | T | 0.13 | -0.053 | 0.023 |
| rs9308614  | 2  | 121337196 | G | A | 0.15 | -0.090 | 0.022 |
| rs6716394  | 2  | 146350724 | A | G | 0.54 | -0.045 | 0.015 |
| rs4668483  | 2  | 16231732  | G | A | 0.68 | -0.040 | 0.016 |

|             |   |           |   |   |      |        |       |
|-------------|---|-----------|---|---|------|--------|-------|
| rs10184004  | 2 | 165508389 | T | C | 0.41 | -0.115 | 0.016 |
| rs11680058  | 2 | 16574669  | A | G | 0.87 | 0.104  | 0.025 |
| rs13406280  | 2 | 166610827 | T | C | 0.49 | -0.047 | 0.015 |
| rs72917531  | 2 | 175238176 | A | C | 0.19 | -0.078 | 0.020 |
| rs36051007  | 2 | 179545859 | T | C | 0.32 | -0.035 | 0.017 |
| rs67383253  | 2 | 181570394 | C | T | 0.37 | -0.035 | 0.016 |
| rs6712905   | 2 | 196952010 | C | T | 0.26 | 0.048  | 0.018 |
| rs4482463   | 2 | 205375909 | A | C | 0.92 | -0.063 | 0.029 |
| rs34329895  | 2 | 208870017 | G | A | 0.60 | -0.063 | 0.016 |
| rs2943650   | 2 | 227105921 | T | C | 0.65 | 0.143  | 0.016 |
| rs13415288  | 2 | 228971884 | C | T | 0.34 | 0.059  | 0.016 |
| rs34339006  | 2 | 234271522 | T | C | 0.39 | 0.092  | 0.016 |
| rs1260326   | 2 | 27730940  | C | T | 0.61 | 0.156  | 0.016 |
| rs77165542  | 2 | 430975    | T | C | 0.04 | -0.155 | 0.042 |
| rs921069    | 2 | 43206922  | G | A | 0.58 | -0.038 | 0.016 |
| rs76675804  | 2 | 43611883  | C | T | 0.10 | -0.311 | 0.026 |
| rs10193538  | 2 | 58981064  | T | G | 0.61 | 0.072  | 0.016 |
| rs243018    | 2 | 60586707  | G | C | 0.45 | 0.088  | 0.016 |
| rs114213622 | 2 | 65243284  | T | G | 0.01 | -0.303 | 0.080 |
| rs10188334  | 2 | 653874    | T | C | 0.17 | -0.087 | 0.020 |
| rs12185610  | 2 | 65661468  | C | A | 0.41 | -0.063 | 0.016 |
| rs4671799   | 2 | 67622243  | G | A | 0.68 | -0.036 | 0.016 |
| rs4832290   | 2 | 86707504  | C | T | 0.77 | -0.053 | 0.018 |
| rs17036126  | 3 | 12287863  | T | C | 0.13 | 0.127  | 0.023 |
| rs11708067  | 3 | 123065778 | G | A | 0.25 | -0.262 | 0.018 |
| rs17036160  | 3 | 12329783  | T | C | 0.12 | -0.088 | 0.024 |
| rs9873519   | 3 | 124921457 | T | C | 0.53 | 0.097  | 0.015 |
| rs1224997   | 3 | 131631201 | T | C | 0.28 | 0.072  | 0.017 |
| rs667920    | 3 | 136069472 | T | G | 0.77 | 0.038  | 0.018 |
| rs9289556   | 3 | 138033181 | T | C | 0.73 | -0.077 | 0.017 |
| rs56243018  | 3 | 141101839 | C | A | 0.05 | -0.214 | 0.036 |
| rs28502438  | 3 | 149220109 | C | T | 0.43 | -0.051 | 0.016 |

|             |   |           |   |   |      |        |       |
|-------------|---|-----------|---|---|------|--------|-------|
| rs7633673   | 3 | 152084243 | A | G | 0.41 | -0.086 | 0.016 |
| rs11706810  | 3 | 160159921 | C | T | 0.48 | -0.106 | 0.015 |
| rs13099581  | 3 | 168226052 | T | C | 0.14 | -0.060 | 0.022 |
| rs8192675   | 3 | 170724883 | C | T | 0.29 | -0.188 | 0.017 |
| rs6444036   | 3 | 184901216 | T | G | 0.16 | 0.041  | 0.021 |
| rs9859406   | 3 | 185534482 | A | G | 0.31 | 0.167  | 0.017 |
| rs2041965   | 3 | 186648411 | T | C | 0.34 | -0.083 | 0.016 |
| rs6777684   | 3 | 187741842 | G | A | 0.61 | 0.134  | 0.016 |
| rs13094957  | 3 | 23457080  | C | T | 0.20 | -0.131 | 0.019 |
| rs1470560   | 3 | 35670150  | A | G | 0.37 | 0.037  | 0.016 |
| rs2624847   | 3 | 50174197  | T | G | 0.74 | -0.084 | 0.017 |
| rs13434089  | 3 | 63948566  | C | T | 0.12 | -0.082 | 0.024 |
| rs9870517   | 3 | 64708600  | C | A | 0.40 | -0.096 | 0.016 |
| rs1374915   | 3 | 71668037  | C | T | 0.42 | -0.036 | 0.016 |
| rs1523766   | 3 | 77670448  | G | A | 0.50 | -0.031 | 0.015 |
| rs978444    | 3 | 93981060  | T | G | 0.55 | -0.057 | 0.015 |
| rs3872707   | 3 | 9514016   | A | G | 0.12 | 0.049  | 0.023 |
| rs7659468   | 4 | 103895317 | G | T | 0.49 | -0.103 | 0.015 |
| rs11728350  | 4 | 106078097 | G | A | 0.13 | 0.110  | 0.023 |
| rs77141743  | 4 | 121774048 | A | G | 0.16 | 0.045  | 0.021 |
| rs730831    | 4 | 1240299   | G | T | 0.04 | -0.123 | 0.041 |
| rs2604918   | 4 | 140879929 | T | G | 0.33 | -0.063 | 0.016 |
| rs2125799   | 4 | 156697784 | C | T | 0.33 | 0.060  | 0.016 |
| rs28819812  | 4 | 157652753 | A | C | 0.32 | -0.060 | 0.016 |
| rs4865436   | 4 | 1788130   | G | C | 0.29 | 0.050  | 0.018 |
| rs2169033   | 4 | 18044357  | T | C | 0.68 | 0.081  | 0.017 |
| rs55691245  | 4 | 185716100 | A | G | 0.14 | -0.160 | 0.022 |
| rs7664347   | 4 | 20265535  | C | T | 0.64 | -0.040 | 0.016 |
| rs10938398  | 4 | 45186139  | A | G | 0.43 | 0.040  | 0.016 |
| rs1996617   | 4 | 52798624  | C | T | 0.29 | 0.101  | 0.017 |
| rs114447556 | 4 | 53207093  | T | C | 0.08 | 0.080  | 0.029 |
| rs10937721  | 4 | 6306763   | C | G | 0.59 | 0.142  | 0.016 |

|             |   |           |   |   |      |        |       |
|-------------|---|-----------|---|---|------|--------|-------|
| rs73222806  | 4 | 753840    | G | C | 0.05 | 0.098  | 0.035 |
| rs6835992   | 4 | 76496817  | G | A | 0.69 | 0.066  | 0.017 |
| rs993380    | 4 | 83584496  | G | A | 0.67 | -0.059 | 0.016 |
| rs28408270  | 4 | 95114572  | T | G | 0.47 | -0.050 | 0.015 |
| rs1961224   | 4 | 95999825  | G | A | 0.35 | -0.065 | 0.016 |
| rs141146025 | 5 | 101966291 | A | C | 0.02 | 0.129  | 0.058 |
| rs75432112  | 5 | 102586407 | A | G | 0.05 | 0.195  | 0.036 |
| rs329118    | 5 | 133861663 | T | C | 0.42 | 0.041  | 0.016 |
| rs111686785 | 5 | 14738965  | G | A | 0.03 | 0.182  | 0.044 |
| rs72734782  | 5 | 14789003  | G | A | 0.21 | 0.066  | 0.019 |
| rs12514030  | 5 | 14810110  | G | T | 0.12 | -0.103 | 0.023 |
| rs1650505   | 5 | 158029734 | A | G | 0.21 | 0.060  | 0.019 |
| rs4343858   | 5 | 176679407 | A | G | 0.23 | -0.042 | 0.018 |
| rs138373837 | 5 | 36219710  | T | C | 0.02 | 0.101  | 0.050 |
| rs62366821  | 5 | 44875449  | G | A | 0.49 | -0.055 | 0.015 |
| rs10067659  | 5 | 52084365  | C | G | 0.79 | -0.081 | 0.019 |
| rs4865796   | 5 | 53272664  | A | G | 0.69 | 0.049  | 0.017 |
| rs464605    | 5 | 55807370  | T | C | 0.75 | 0.080  | 0.019 |
| rs34341     | 5 | 74934009  | T | A | 0.58 | 0.073  | 0.016 |
| rs7732130   | 5 | 76435004  | A | G | 0.68 | -0.132 | 0.016 |
| rs6870983   | 5 | 87697533  | T | C | 0.21 | -0.067 | 0.019 |
| rs34483452  | 5 | 87986314  | A | C | 0.14 | 0.077  | 0.023 |
| rs7752666   | 6 | 107445266 | T | C | 0.32 | -0.035 | 0.017 |
| rs80196932  | 6 | 117996631 | C | T | 0.16 | -0.064 | 0.021 |
| rs11759026  | 6 | 126792095 | G | A | 0.23 | 0.136  | 0.018 |
| rs2876354   | 6 | 137295352 | T | C | 0.47 | -0.083 | 0.016 |
| rs7742292   | 6 | 138864489 | C | T | 0.40 | 0.041  | 0.016 |
| rs2982521   | 6 | 139835329 | T | A | 0.63 | -0.110 | 0.016 |
| rs9390022   | 6 | 143056556 | C | T | 0.38 | -0.042 | 0.016 |
| rs1538247   | 6 | 153395344 | C | T | 0.30 | 0.093  | 0.017 |
| rs2179168   | 6 | 15477030  | A | G | 0.80 | 0.046  | 0.019 |
| rs501470    | 6 | 160770918 | G | T | 0.47 | -0.089 | 0.015 |

|             |   |           |   |   |      |        |       |
|-------------|---|-----------|---|---|------|--------|-------|
| rs4709746   | 6 | 164133001 | T | C | 0.13 | -0.050 | 0.023 |
| rs7774074   | 6 | 20517130  | A | C | 0.21 | 0.039  | 0.019 |
| rs35261542  | 6 | 20675792  | A | C | 0.26 | 0.268  | 0.017 |
| rs3117189   | 6 | 32033944  | G | A | 0.85 | 0.281  | 0.021 |
| rs2780215   | 6 | 34236973  | G | A | 0.07 | -0.110 | 0.033 |
| rs7748962   | 6 | 43759927  | A | G | 0.77 | 0.113  | 0.018 |
| rs9472139   | 6 | 43813711  | C | G | 0.29 | 0.065  | 0.017 |
| rs3798519   | 6 | 50788778  | C | A | 0.18 | 0.107  | 0.020 |
| rs9370243   | 6 | 53789830  | T | G | 0.08 | 0.079  | 0.028 |
| rs9449295   | 6 | 64163807  | C | T | 0.54 | 0.036  | 0.015 |
| rs9379084   | 6 | 7231843   | A | G | 0.12 | -0.198 | 0.025 |
| rs187653072 | 7 | 102976385 | C | T | 0.03 | 0.134  | 0.044 |
| rs73184014  | 7 | 104516274 | G | A | 0.22 | -0.053 | 0.019 |
| rs6976111   | 7 | 117495667 | A | C | 0.30 | 0.074  | 0.017 |
| rs13237518  | 7 | 12269593  | A | C | 0.41 | 0.048  | 0.016 |
| rs3996350   | 7 | 130427057 | C | G | 0.50 | -0.086 | 0.015 |
| rs60251368  | 7 | 140522073 | G | A | 0.06 | 0.096  | 0.034 |
| rs4252505   | 7 | 142607301 | G | A | 0.06 | 0.070  | 0.031 |
| rs17168486  | 7 | 14898282  | T | C | 0.17 | 0.162  | 0.020 |
| rs4725959   | 7 | 150534741 | G | A | 0.22 | 0.042  | 0.019 |
| rs10228796  | 7 | 15064190  | G | C | 0.55 | 0.160  | 0.015 |
| rs6946660   | 7 | 156948648 | C | T | 0.35 | -0.107 | 0.016 |
| rs11762413  | 7 | 2090387   | G | C | 0.25 | -0.085 | 0.018 |
| rs2188848   | 7 | 23884697  | G | A | 0.20 | -0.055 | 0.019 |
| rs860262    | 7 | 28194397  | A | C | 0.50 | -0.158 | 0.015 |
| rs917195    | 7 | 30728452  | T | C | 0.23 | -0.073 | 0.018 |
| rs730497    | 7 | 44223721  | A | G | 0.18 | 0.445  | 0.020 |
| rs73121277  | 7 | 50577968  | C | T | 0.28 | 0.084  | 0.017 |
| rs6975279   | 7 | 69649683  | A | C | 0.26 | 0.101  | 0.018 |
| rs6956980   | 7 | 89803634  | C | T | 0.53 | 0.083  | 0.015 |
| rs7834323   | 8 | 10671984  | C | T | 0.29 | -0.074 | 0.017 |
| rs727582    | 8 | 116650468 | G | A | 0.34 | -0.093 | 0.016 |

|            |   |           |   |   |      |        |       |
|------------|---|-----------|---|---|------|--------|-------|
| rs13266634 | 8 | 118184783 | T | C | 0.31 | -0.277 | 0.017 |
| rs12056338 | 8 | 12643055  | T | G | 0.42 | 0.050  | 0.016 |
| rs17772814 | 8 | 128711742 | A | G | 0.08 | -0.099 | 0.029 |
| rs1561927  | 8 | 129568078 | T | C | 0.73 | -0.048 | 0.017 |
| rs35753840 | 8 | 14148990  | C | A | 0.39 | 0.054  | 0.016 |
| rs13268508 | 8 | 145525277 | T | C | 0.38 | 0.087  | 0.016 |
| rs2953845  | 8 | 145972950 | T | C | 0.55 | 0.042  | 0.015 |
| rs6558173  | 8 | 22492103  | T | G | 0.35 | 0.039  | 0.016 |
| rs2725370  | 8 | 30852826  | C | T | 0.70 | -0.049 | 0.017 |
| rs57735787 | 8 | 34438332  | G | A | 0.25 | -0.042 | 0.018 |
| rs13262861 | 8 | 41508577  | A | C | 0.17 | -0.121 | 0.021 |
| rs7813865  | 8 | 57506937  | C | T | 0.29 | 0.041  | 0.017 |
| rs10101067 | 8 | 72407374  | C | G | 0.08 | 0.092  | 0.029 |
| rs28792187 | 8 | 74568099  | G | A | 0.07 | 0.123  | 0.030 |
| rs1895874  | 8 | 95675372  | A | G | 0.50 | 0.048  | 0.015 |
| rs10808671 | 8 | 95967372  | G | A | 0.53 | -0.073 | 0.015 |
| rs60384372 | 8 | 9974584   | G | A | 0.47 | -0.056 | 0.015 |
| rs1567353  | 9 | 1033773   | G | C | 0.31 | 0.035  | 0.017 |
| rs10119430 | 9 | 111938268 | A | G | 0.79 | -0.054 | 0.019 |
| rs1431819  | 9 | 116943357 | G | A | 0.70 | 0.038  | 0.017 |
| rs10818763 | 9 | 125689694 | T | C | 0.13 | -0.108 | 0.023 |
| rs10739629 | 9 | 126093422 | T | C | 0.51 | -0.036 | 0.015 |
| rs529565   | 9 | 136149500 | C | T | 0.32 | 0.164  | 0.017 |
| rs28642213 | 9 | 139248082 | G | A | 0.75 | 0.169  | 0.018 |
| rs12380322 | 9 | 19074538  | G | A | 0.39 | 0.051  | 0.016 |
| rs10965247 | 9 | 22132729  | G | A | 0.18 | -0.302 | 0.020 |
| rs7018475  | 9 | 22137685  | G | T | 0.26 | 0.178  | 0.018 |
| rs11788619 | 9 | 22258082  | T | A | 0.03 | -0.134 | 0.048 |
| rs2150854  | 9 | 28411949  | T | G | 0.33 | 0.072  | 0.016 |
| rs4237150  | 9 | 4290085   | C | G | 0.40 | 0.091  | 0.016 |
| rs67269808 | 9 | 81907986  | G | A | 0.06 | -0.130 | 0.032 |
| rs2796441  | 9 | 84308948  | A | G | 0.42 | -0.096 | 0.016 |

|            |   |          |   |   |      |        |       |
|------------|---|----------|---|---|------|--------|-------|
| rs7023781  | 9 | 96447178 | T | C | 0.27 | 0.058  | 0.017 |
| rs10993072 | 9 | 96915002 | T | C | 0.32 | 0.083  | 0.016 |
| rs28496034 | 9 | 98278332 | G | C | 0.33 | -0.057 | 0.016 |

EAF: effect allele frequency; SE: standard error; SNP: single nucleotide polymorphism.



**Table S5. Genetic proxies for glycemic control by any mechanism, and estimates for their association with glycosylated hemoglobin (for the outcome of left ventricular ejection fraction).**

| SNP        | Chromosome | Position  | Effect allele | Other allele | EAF  | Beta   | SE    |
|------------|------------|-----------|---------------|--------------|------|--------|-------|
| rs2482506  | 10         | 104563743 | G             | C            | 0.25 | -0.053 | 0.018 |
| rs7090695  | 10         | 112801213 | C             | G            | 0.80 | 0.060  | 0.019 |
| rs11196174 | 10         | 114734096 | G             | A            | 0.29 | 0.252  | 0.017 |
| rs4918790  | 10         | 114830254 | A             | G            | 0.91 | -0.117 | 0.028 |
| rs4752351  | 10         | 121685016 | C             | T            | 0.20 | 0.087  | 0.019 |
| rs11257655 | 10         | 12307894  | T             | C            | 0.21 | 0.219  | 0.019 |
| rs946859   | 10         | 13565429  | A             | G            | 0.47 | -0.075 | 0.015 |
| rs3122231  | 10         | 44027356  | C             | T            | 0.65 | 0.050  | 0.016 |
| rs949693   | 10         | 70354574  | A             | G            | 0.61 | -0.050 | 0.016 |
| rs11592899 | 10         | 71333783  | A             | G            | 0.34 | -0.055 | 0.016 |
| rs2812535  | 10         | 71456857  | A             | G            | 0.62 | 0.069  | 0.016 |
| rs697239   | 10         | 80947438  | C             | T            | 0.46 | -0.105 | 0.015 |
| rs11201992 | 10         | 88117318  | A             | C            | 0.46 | -0.038 | 0.015 |
| rs1111875  | 10         | 94462882  | T             | C            | 0.41 | -0.181 | 0.016 |
| rs66536955 | 10         | 94737667  | C             | T            | 0.26 | 0.044  | 0.017 |
| rs34041345 | 10         | 99174580  | G             | T            | 0.26 | 0.060  | 0.018 |
| rs529623   | 11         | 117693255 | C             | T            | 0.52 | -0.059 | 0.015 |
| rs10893830 | 11         | 128044159 | T             | C            | 0.13 | -0.058 | 0.023 |
| rs10750397 | 11         | 128234144 | G             | A            | 0.72 | -0.040 | 0.017 |
| rs67232546 | 11         | 128398938 | T             | C            | 0.21 | 0.067  | 0.019 |
| rs757110   | 11         | 17418477  | A             | C            | 0.64 | -0.112 | 0.016 |
| rs11042987 | 11         | 2201059   | A             | C            | 0.58 | -0.034 | 0.016 |
| rs2283167  | 11         | 2580063   | A             | G            | 0.14 | -0.055 | 0.023 |
| rs231362   | 11         | 2691471   | G             | A            | 0.52 | 0.120  | 0.015 |
| rs10767659 | 11         | 27686196  | T             | G            | 0.67 | -0.041 | 0.016 |
| rs60808706 | 11         | 2857233   | A             | G            | 0.05 | -0.227 | 0.035 |
| rs2289488  | 11         | 2892955   | C             | G            | 0.40 | 0.040  | 0.016 |

|            |    |           |   |   |      |        |       |
|------------|----|-----------|---|---|------|--------|-------|
| rs74673753 | 11 | 32623621  | T | A | 0.06 | -0.106 | 0.033 |
| rs2956092  | 11 | 34908780  | C | T | 0.69 | -0.059 | 0.017 |
| rs3816605  | 11 | 47857253  | C | T | 0.45 | -0.080 | 0.015 |
| rs7483027  | 11 | 58128015  | C | T | 0.38 | -0.061 | 0.016 |
| rs174541   | 11 | 61565908  | C | T | 0.36 | -0.098 | 0.016 |
| rs12789028 | 11 | 65326154  | A | G | 0.20 | 0.084  | 0.019 |
| rs11602873 | 11 | 72460762  | T | A | 0.16 | -0.187 | 0.021 |
| rs11236524 | 11 | 75464344  | C | T | 0.09 | 0.069  | 0.027 |
| rs2513505  | 11 | 76230357  | A | C | 0.60 | 0.033  | 0.016 |
| rs12802861 | 11 | 8387806   | T | C | 0.28 | -0.052 | 0.017 |
| rs10830963 | 11 | 92708710  | G | C | 0.28 | 0.297  | 0.017 |
| rs3020069  | 11 | 93057087  | A | G | 0.68 | 0.093  | 0.016 |
| rs1426371  | 12 | 108629780 | A | G | 0.26 | -0.074 | 0.018 |
| rs79310463 | 12 | 118406696 | T | C | 0.13 | 0.104  | 0.023 |
| rs56348580 | 12 | 121432117 | C | G | 0.31 | -0.037 | 0.017 |
| rs7975763  | 12 | 123604053 | T | C | 0.20 | -0.057 | 0.019 |
| rs2066827  | 12 | 12871099  | G | T | 0.23 | 0.102  | 0.018 |
| rs11614914 | 12 | 133070294 | T | C | 0.33 | 0.078  | 0.016 |
| rs12828318 | 12 | 133766122 | G | A | 0.18 | -0.057 | 0.020 |
| rs10841886 | 12 | 21864377  | C | T | 0.23 | -0.082 | 0.018 |
| rs1480029  | 12 | 26356032  | A | G | 0.46 | 0.042  | 0.015 |
| rs3751239  | 12 | 27963676  | G | C | 0.20 | -0.160 | 0.019 |
| rs7298690  | 12 | 4313438   | C | T | 0.21 | 0.060  | 0.019 |
| rs3217893  | 12 | 4403876   | T | C | 0.09 | -0.171 | 0.030 |
| rs2732469  | 12 | 48712932  | A | T | 0.43 | -0.258 | 0.015 |
| rs61937817 | 12 | 57212823  | G | T | 0.11 | 0.060  | 0.024 |
| rs11173646 | 12 | 61250814  | T | A | 0.82 | -0.046 | 0.020 |
| rs2257883  | 12 | 66216162  | A | G | 0.13 | 0.150  | 0.023 |
| rs12371967 | 12 | 66346714  | C | T | 0.17 | -0.043 | 0.020 |
| rs10879261 | 12 | 71520761  | G | T | 0.41 | 0.068  | 0.016 |
| rs11108094 | 12 | 95928113  | A | C | 0.07 | 0.099  | 0.030 |
| rs6538805  | 12 | 97849120  | C | T | 0.39 | -0.076 | 0.016 |

|             |    |           |   |   |      |        |       |
|-------------|----|-----------|---|---|------|--------|-------|
| rs9587811   | 13 | 109946882 | A | C | 0.41 | -0.056 | 0.016 |
| rs314879    | 13 | 23309382  | T | C | 0.79 | -0.069 | 0.019 |
| rs34584161  | 13 | 26776999  | G | A | 0.24 | -0.063 | 0.018 |
| rs380854    | 13 | 33574631  | A | G | 0.58 | -0.058 | 0.016 |
| rs9316500   | 13 | 51094114  | G | T | 0.29 | -0.067 | 0.017 |
| rs7991679   | 13 | 58691107  | A | T | 0.16 | -0.081 | 0.021 |
| rs1215451   | 13 | 80715893  | A | G | 0.29 | -0.131 | 0.017 |
| rs112324411 | 14 | 101258584 | T | C | 0.07 | -0.101 | 0.032 |
| rs2295388   | 14 | 101309759 | A | G | 0.22 | -0.073 | 0.019 |
| rs4906272   | 14 | 103376031 | T | C | 0.16 | 0.046  | 0.021 |
| rs12883788  | 14 | 33303540  | T | C | 0.46 | 0.060  | 0.015 |
| rs7147483   | 14 | 38804675  | C | T | 0.25 | -0.158 | 0.018 |
| rs723355    | 14 | 47304091  | A | G | 0.50 | -0.034 | 0.015 |
| rs4902002   | 14 | 61229411  | A | G | 0.71 | -0.034 | 0.017 |
| rs242105    | 14 | 69459229  | C | A | 0.28 | 0.062  | 0.017 |
| rs7156625   | 14 | 79942647  | A | G | 0.22 | 0.037  | 0.019 |
| rs8010382   | 14 | 91963722  | G | A | 0.41 | 0.046  | 0.016 |
| rs8043085   | 15 | 38828140  | T | G | 0.23 | 0.071  | 0.018 |
| rs11856877  | 15 | 40620560  | G | A | 0.11 | 0.071  | 0.024 |
| rs1473781   | 15 | 41818917  | A | G | 0.35 | 0.067  | 0.016 |
| rs71472935  | 15 | 52565725  | C | G | 0.11 | -0.145 | 0.025 |
| rs7163757   | 15 | 62391608  | T | C | 0.43 | -0.042 | 0.015 |
| rs7178762   | 15 | 63871292  | T | C | 0.55 | -0.057 | 0.015 |
| rs9479      | 15 | 74328576  | G | A | 0.49 | 0.052  | 0.015 |
| rs8033589   | 15 | 75596685  | A | G | 0.76 | 0.058  | 0.018 |
| rs12910361  | 15 | 77782335  | G | A | 0.71 | 0.161  | 0.017 |
| rs893617    | 15 | 90381278  | T | C | 0.72 | -0.136 | 0.017 |
| rs2290202   | 15 | 91512267  | T | G | 0.13 | 0.085  | 0.023 |
| rs9927842   | 16 | 15153717  | C | T | 0.84 | -0.056 | 0.021 |
| rs8056890   | 16 | 28897452  | A | G | 0.36 | 0.105  | 0.016 |
| rs8054556   | 16 | 29958216  | A | G | 0.47 | 0.077  | 0.015 |
| rs55857387  | 16 | 300388    | C | T | 0.20 | -0.142 | 0.019 |

|            |    |          |   |   |      |        |       |
|------------|----|----------|---|---|------|--------|-------|
| rs8061528  | 16 | 3656482  | T | C | 0.21 | 0.092  | 0.019 |
| rs2024449  | 16 | 53494617 | C | T | 0.44 | -0.056 | 0.015 |
| rs1421085  | 16 | 53800954 | C | T | 0.40 | 0.154  | 0.016 |
| rs56125990 | 16 | 69742387 | G | A | 0.15 | 0.065  | 0.021 |
| rs4788815  | 16 | 71634811 | T | A | 0.66 | 0.056  | 0.016 |
| rs72802365 | 16 | 75246035 | C | G | 0.08 | -0.163 | 0.029 |
| rs2966117  | 16 | 81599271 | T | G | 0.48 | 0.059  | 0.015 |
| rs11117364 | 16 | 88132199 | G | A | 0.68 | 0.066  | 0.017 |
| rs9937296  | 16 | 88554480 | C | T | 0.86 | 0.069  | 0.023 |
| rs66461358 | 16 | 89535257 | C | T | 0.15 | 0.060  | 0.021 |
| rs12934854 | 16 | 950028   | A | G | 0.17 | 0.043  | 0.020 |
| rs925095   | 17 | 17344653 | T | C | 0.39 | -0.075 | 0.016 |
| rs2297508  | 17 | 17715317 | G | C | 0.65 | -0.150 | 0.016 |
| rs9913225  | 17 | 27570622 | A | G | 0.58 | -0.075 | 0.016 |
| rs1109442  | 17 | 34862220 | C | T | 0.47 | 0.071  | 0.015 |
| rs3110641  | 17 | 36047417 | G | A | 0.78 | 0.091  | 0.019 |
| rs11651755 | 17 | 36099840 | T | C | 0.51 | -0.124 | 0.015 |
| rs3786017  | 17 | 3830340  | C | T | 0.11 | 0.054  | 0.025 |
| rs8071043  | 17 | 3988451  | C | T | 0.33 | 0.066  | 0.016 |
| rs1905339  | 17 | 40582296 | C | T | 0.34 | 0.097  | 0.016 |
| rs35895680 | 17 | 47060322 | A | C | 0.33 | -0.089 | 0.016 |
| rs366577   | 17 | 4854480  | T | C | 0.60 | -0.051 | 0.016 |
| rs57767539 | 17 | 62203059 | A | G | 0.07 | 0.136  | 0.031 |
| rs11658220 | 17 | 65646092 | A | G | 0.10 | 0.100  | 0.025 |
| rs12603589 | 17 | 65825248 | C | T | 0.19 | 0.103  | 0.020 |
| rs7224711  | 17 | 76772288 | T | C | 0.53 | -0.069 | 0.015 |
| rs303760   | 18 | 21083738 | T | C | 0.35 | 0.052  | 0.016 |
| rs16965062 | 18 | 31581247 | T | C | 0.43 | 0.034  | 0.015 |
| rs7227272  | 18 | 36746623 | A | G | 0.10 | -0.062 | 0.026 |
| rs410150   | 18 | 40066006 | T | C | 0.80 | -0.047 | 0.019 |
| rs17596995 | 18 | 53166594 | A | G | 0.20 | -0.049 | 0.019 |
| rs1517037  | 18 | 56878274 | T | C | 0.19 | -0.093 | 0.020 |

|             |    |           |   |   |      |        |       |
|-------------|----|-----------|---|---|------|--------|-------|
| rs6567160   | 18 | 57829135  | C | T | 0.23 | 0.097  | 0.018 |
| rs74625348  | 18 | 60846430  | C | G | 0.23 | -0.044 | 0.019 |
| rs12963820  | 18 | 63426213  | A | T | 0.27 | 0.034  | 0.017 |
| rs7240767   | 18 | 7070642   | C | T | 0.39 | 0.063  | 0.016 |
| rs6565922   | 18 | 74558999  | T | C | 0.38 | 0.078  | 0.016 |
| rs9384      | 19 | 13010643  | T | G | 0.38 | -0.107 | 0.016 |
| rs10404726  | 19 | 18834514  | T | C | 0.47 | -0.035 | 0.015 |
| rs58542926  | 19 | 19379549  | T | C | 0.08 | 0.139  | 0.029 |
| rs924150    | 19 | 31829903  | C | A | 0.39 | -0.087 | 0.016 |
| rs4805881   | 19 | 33896432  | C | A | 0.67 | -0.077 | 0.016 |
| rs429358    | 19 | 45411941  | C | T | 0.16 | -0.142 | 0.021 |
| rs8107527   | 19 | 46158417  | A | G | 0.28 | 0.105  | 0.017 |
| rs9304665   | 19 | 47602577  | A | T | 0.77 | 0.103  | 0.018 |
| rs2115107   | 19 | 7968168   | A | G | 0.38 | 0.069  | 0.016 |
| rs7554251   | 1  | 11317932  | C | T | 0.73 | 0.036  | 0.017 |
| rs1127215   | 1  | 117532790 | T | C | 0.42 | -0.065 | 0.016 |
| rs66464442  | 1  | 118171801 | A | C | 0.32 | 0.121  | 0.016 |
| rs1493694   | 1  | 120526982 | T | C | 0.11 | 0.146  | 0.025 |
| rs115983556 | 1  | 149873582 | C | A | 0.08 | -0.153 | 0.028 |
| rs1194592   | 1  | 154324384 | G | C | 0.44 | -0.044 | 0.015 |
| rs3020781   | 1  | 155269776 | G | A | 0.27 | 0.086  | 0.017 |
| rs7546252   | 1  | 172368310 | G | A | 0.56 | -0.092 | 0.015 |
| rs539515    | 1  | 177889025 | C | A | 0.21 | 0.049  | 0.019 |
| rs2816177   | 1  | 179248952 | G | A | 0.41 | 0.049  | 0.016 |
| rs41304257  | 1  | 201849926 | G | A | 0.28 | -0.042 | 0.017 |
| rs61817176  | 1  | 206621028 | C | A | 0.52 | -0.074 | 0.015 |
| rs10916780  | 1  | 20707153  | G | A | 0.20 | -0.045 | 0.019 |
| rs340874    | 1  | 214159256 | C | T | 0.57 | 0.166  | 0.015 |
| rs1337101   | 1  | 219726100 | T | G | 0.32 | -0.095 | 0.016 |
| rs348330    | 1  | 229672955 | A | G | 0.63 | -0.119 | 0.016 |
| rs10925635  | 1  | 235573486 | C | A | 0.64 | 0.046  | 0.016 |
| rs17261915  | 1  | 26756856  | C | T | 0.25 | 0.074  | 0.018 |

|            |    |           |   |   |      |        |       |
|------------|----|-----------|---|---|------|--------|-------|
| rs3753693  | 1  | 29060898  | T | C | 0.41 | -0.066 | 0.016 |
| rs61779284 | 1  | 39855177  | A | G | 0.21 | 0.130  | 0.019 |
| rs79090772 | 1  | 51209148  | C | T | 0.09 | -0.219 | 0.027 |
| rs2269247  | 1  | 64107284  | T | C | 0.18 | -0.056 | 0.020 |
| rs11583755 | 1  | 6672729   | C | A | 0.36 | 0.107  | 0.016 |
| rs2613499  | 1  | 72751552  | G | A | 0.19 | -0.052 | 0.019 |
| rs10159026 | 1  | 96404462  | T | C | 0.25 | -0.062 | 0.018 |
| rs6137042  | 20 | 2100095   | A | G | 0.20 | -0.050 | 0.019 |
| rs7274134  | 20 | 22428284  | T | C | 0.25 | -0.062 | 0.018 |
| rs6059662  | 20 | 32675727  | G | A | 0.65 | 0.037  | 0.016 |
| rs2038457  | 20 | 42239145  | G | A | 0.81 | 0.041  | 0.020 |
| rs12625671 | 20 | 42994812  | C | T | 0.11 | 0.118  | 0.025 |
| rs6066138  | 20 | 45594711  | A | G | 0.28 | -0.135 | 0.017 |
| rs6021276  | 20 | 50155386  | C | T | 0.64 | -0.074 | 0.016 |
| rs865034   | 20 | 51261615  | C | T | 0.66 | 0.040  | 0.016 |
| rs4810145  | 20 | 57396495  | C | T | 0.52 | 0.068  | 0.015 |
| rs6011155  | 20 | 62450664  | C | T | 0.37 | -0.074 | 0.016 |
| rs2240716  | 22 | 19969696  | T | C | 0.30 | 0.074  | 0.017 |
| rs56392746 | 22 | 30451688  | A | G | 0.09 | -0.138 | 0.026 |
| rs138771   | 22 | 35705359  | G | A | 0.81 | -0.055 | 0.020 |
| rs1801645  | 22 | 50356850  | T | C | 0.74 | -0.059 | 0.018 |
| rs79950062 | 2  | 111940612 | C | T | 0.13 | -0.053 | 0.023 |
| rs9308614  | 2  | 121337196 | G | A | 0.15 | -0.090 | 0.022 |
| rs6716394  | 2  | 146350724 | A | G | 0.54 | -0.045 | 0.015 |
| rs4668483  | 2  | 16231732  | G | A | 0.68 | -0.040 | 0.016 |
| rs10184004 | 2  | 165508389 | T | C | 0.41 | -0.115 | 0.016 |
| rs11680058 | 2  | 16574669  | A | G | 0.87 | 0.104  | 0.025 |
| rs13406280 | 2  | 166610827 | T | C | 0.49 | -0.047 | 0.015 |
| rs72917531 | 2  | 175238176 | A | C | 0.19 | -0.078 | 0.020 |
| rs36051007 | 2  | 179545859 | T | C | 0.32 | -0.035 | 0.017 |
| rs67383253 | 2  | 181570394 | C | T | 0.37 | -0.035 | 0.016 |
| rs6712905  | 2  | 196952010 | C | T | 0.26 | 0.048  | 0.018 |

|            |   |           |   |   |      |        |       |
|------------|---|-----------|---|---|------|--------|-------|
| rs4482463  | 2 | 205375909 | A | C | 0.92 | -0.063 | 0.029 |
| rs34329895 | 2 | 208870017 | G | A | 0.60 | -0.063 | 0.016 |
| rs2943650  | 2 | 227105921 | T | C | 0.65 | 0.143  | 0.016 |
| rs13415288 | 2 | 228971884 | C | T | 0.34 | 0.059  | 0.016 |
| rs34339006 | 2 | 234271522 | T | C | 0.39 | 0.092  | 0.016 |
| rs1260326  | 2 | 27730940  | C | T | 0.61 | 0.156  | 0.016 |
| rs921069   | 2 | 43206922  | G | A | 0.58 | -0.038 | 0.016 |
| rs76675804 | 2 | 43611883  | C | T | 0.10 | -0.311 | 0.026 |
| rs10193538 | 2 | 58981064  | T | G | 0.61 | 0.072  | 0.016 |
| rs243018   | 2 | 60586707  | G | C | 0.45 | 0.088  | 0.016 |
| rs10188334 | 2 | 653874    | T | C | 0.17 | -0.087 | 0.020 |
| rs12185610 | 2 | 65661468  | C | A | 0.41 | -0.063 | 0.016 |
| rs4671799  | 2 | 67622243  | G | A | 0.68 | -0.036 | 0.016 |
| rs4832290  | 2 | 86707504  | C | T | 0.77 | -0.053 | 0.018 |
| rs17036126 | 3 | 12287863  | T | C | 0.13 | 0.127  | 0.023 |
| rs11708067 | 3 | 123065778 | G | A | 0.25 | -0.262 | 0.018 |
| rs17036160 | 3 | 12329783  | T | C | 0.12 | -0.088 | 0.024 |
| rs9873519  | 3 | 124921457 | T | C | 0.53 | 0.097  | 0.015 |
| rs1225004  | 3 | 131626991 | C | T | 0.28 | 0.071  | 0.017 |
| rs667920   | 3 | 136069472 | T | G | 0.77 | 0.038  | 0.018 |
| rs6766859  | 3 | 138055136 | T | C | 0.63 | -0.091 | 0.016 |
| rs34573045 | 3 | 149196752 | G | C | 0.43 | 0.049  | 0.015 |
| rs7633673  | 3 | 152084243 | A | G | 0.41 | -0.086 | 0.016 |
| rs11706810 | 3 | 160159921 | C | T | 0.48 | -0.106 | 0.015 |
| rs13099581 | 3 | 168226052 | T | C | 0.14 | -0.060 | 0.022 |
| rs8192675  | 3 | 170724883 | C | T | 0.29 | -0.188 | 0.017 |
| rs6444036  | 3 | 184901216 | T | G | 0.16 | 0.041  | 0.021 |
| rs9859406  | 3 | 185534482 | A | G | 0.31 | 0.167  | 0.017 |
| rs2041965  | 3 | 186648411 | T | C | 0.34 | -0.083 | 0.016 |
| rs6777684  | 3 | 187741842 | G | A | 0.61 | 0.134  | 0.016 |
| rs13094957 | 3 | 23457080  | C | T | 0.20 | -0.131 | 0.019 |
| rs1470560  | 3 | 35670150  | A | G | 0.37 | 0.037  | 0.016 |

|             |   |           |   |   |      |        |       |
|-------------|---|-----------|---|---|------|--------|-------|
| rs2624847   | 3 | 50174197  | T | G | 0.74 | -0.084 | 0.017 |
| rs13434089  | 3 | 63948566  | C | T | 0.12 | -0.082 | 0.024 |
| rs9870517   | 3 | 64708600  | C | A | 0.40 | -0.096 | 0.016 |
| rs1374915   | 3 | 71668037  | C | T | 0.42 | -0.036 | 0.016 |
| rs1523766   | 3 | 77670448  | G | A | 0.50 | -0.031 | 0.015 |
| rs978444    | 3 | 93981060  | T | G | 0.55 | -0.057 | 0.015 |
| rs3872707   | 3 | 9514016   | A | G | 0.12 | 0.049  | 0.023 |
| rs7659468   | 4 | 103895317 | G | T | 0.49 | -0.103 | 0.015 |
| rs11728350  | 4 | 106078097 | G | A | 0.13 | 0.110  | 0.023 |
| rs77141743  | 4 | 121774048 | A | G | 0.16 | 0.045  | 0.021 |
| rs2604918   | 4 | 140879929 | T | G | 0.33 | -0.063 | 0.016 |
| rs2125799   | 4 | 156697784 | C | T | 0.33 | 0.060  | 0.016 |
| rs28819812  | 4 | 157652753 | A | C | 0.32 | -0.060 | 0.016 |
| rs4865436   | 4 | 1788130   | G | C | 0.29 | 0.050  | 0.018 |
| rs2169033   | 4 | 18044357  | T | C | 0.68 | 0.081  | 0.017 |
| rs55691245  | 4 | 185716100 | A | G | 0.14 | -0.160 | 0.022 |
| rs7664347   | 4 | 20265535  | C | T | 0.64 | -0.040 | 0.016 |
| rs10938398  | 4 | 45186139  | A | G | 0.43 | 0.040  | 0.016 |
| rs1996617   | 4 | 52798624  | C | T | 0.29 | 0.101  | 0.017 |
| rs114447556 | 4 | 53207093  | T | C | 0.08 | 0.080  | 0.029 |
| rs10937721  | 4 | 6306763   | C | G | 0.59 | 0.142  | 0.016 |
| rs75724417  | 4 | 757921    | T | C | 0.05 | 0.089  | 0.035 |
| rs6835992   | 4 | 76496817  | G | A | 0.69 | 0.066  | 0.017 |
| rs993380    | 4 | 83584496  | G | A | 0.67 | -0.059 | 0.016 |
| rs28408270  | 4 | 95114572  | T | G | 0.47 | -0.050 | 0.015 |
| rs1961224   | 4 | 95999825  | G | A | 0.35 | -0.065 | 0.016 |
| rs116782923 | 5 | 102331465 | T | A | 0.05 | 0.197  | 0.034 |
| rs329118    | 5 | 133861663 | T | C | 0.42 | 0.041  | 0.016 |
| rs9312873   | 5 | 14777799  | G | A | 0.10 | -0.160 | 0.026 |
| rs1650505   | 5 | 158029734 | A | G | 0.21 | 0.060  | 0.019 |
| rs4343858   | 5 | 176679407 | A | G | 0.23 | -0.042 | 0.018 |
| rs62366821  | 5 | 44875449  | G | A | 0.49 | -0.055 | 0.015 |



|            |   |           |   |   |      |        |       |
|------------|---|-----------|---|---|------|--------|-------|
| rs10067659 | 5 | 52084365  | C | G | 0.79 | -0.081 | 0.019 |
| rs4865796  | 5 | 53272664  | A | G | 0.69 | 0.049  | 0.017 |
| rs464605   | 5 | 55807370  | T | C | 0.75 | 0.080  | 0.019 |
| rs34341    | 5 | 74934009  | T | A | 0.58 | 0.073  | 0.016 |
| rs7732130  | 5 | 76435004  | A | G | 0.68 | -0.132 | 0.016 |
| rs6870983  | 5 | 87697533  | T | C | 0.21 | -0.067 | 0.019 |
| rs34483452 | 5 | 87986314  | A | C | 0.14 | 0.077  | 0.023 |
| rs7752666  | 6 | 107445266 | T | C | 0.32 | -0.035 | 0.017 |
| rs80196932 | 6 | 117996631 | C | T | 0.16 | -0.064 | 0.021 |
| rs11759026 | 6 | 126792095 | G | A | 0.23 | 0.136  | 0.018 |
| rs2876354  | 6 | 137295352 | T | C | 0.47 | -0.083 | 0.016 |
| rs7742292  | 6 | 138864489 | C | T | 0.40 | 0.041  | 0.016 |
| rs2982521  | 6 | 139835329 | T | A | 0.63 | -0.110 | 0.016 |
| rs9390022  | 6 | 143056556 | C | T | 0.38 | -0.042 | 0.016 |
| rs1538247  | 6 | 153395344 | C | T | 0.30 | 0.093  | 0.017 |
| rs2179168  | 6 | 15477030  | A | G | 0.80 | 0.046  | 0.019 |
| rs501470   | 6 | 160770918 | G | T | 0.47 | -0.089 | 0.015 |
| rs4709746  | 6 | 164133001 | T | C | 0.13 | -0.050 | 0.023 |
| rs7774074  | 6 | 20517130  | A | C | 0.21 | 0.039  | 0.019 |
| rs35261542 | 6 | 20675792  | A | C | 0.26 | 0.268  | 0.017 |
| rs3117189  | 6 | 32033944  | G | A | 0.85 | 0.281  | 0.021 |
| rs2780215  | 6 | 34236973  | G | A | 0.07 | -0.110 | 0.033 |
| rs7748962  | 6 | 43759927  | A | G | 0.77 | 0.113  | 0.018 |
| rs9472139  | 6 | 43813711  | C | G | 0.29 | 0.065  | 0.017 |
| rs3798519  | 6 | 50788778  | C | A | 0.18 | 0.107  | 0.020 |
| rs9370243  | 6 | 53789830  | T | G | 0.08 | 0.079  | 0.028 |
| rs9449295  | 6 | 64163807  | C | T | 0.54 | 0.036  | 0.015 |
| rs9379084  | 6 | 7231843   | A | G | 0.12 | -0.198 | 0.025 |
| rs62482399 | 7 | 102972707 | T | C | 0.09 | 0.087  | 0.027 |
| rs73184014 | 7 | 104516274 | G | A | 0.22 | -0.053 | 0.019 |
| rs6976111  | 7 | 117495667 | A | C | 0.30 | 0.074  | 0.017 |
| rs13237518 | 7 | 12269593  | A | C | 0.41 | 0.048  | 0.016 |

|            |   |           |   |   |      |        |       |
|------------|---|-----------|---|---|------|--------|-------|
| rs3996350  | 7 | 130427057 | C | G | 0.50 | -0.086 | 0.015 |
| rs60251368 | 7 | 140522073 | G | A | 0.06 | 0.096  | 0.034 |
| rs4252505  | 7 | 142607301 | G | A | 0.06 | 0.070  | 0.031 |
| rs17168486 | 7 | 14898282  | T | C | 0.17 | 0.162  | 0.020 |
| rs4725959  | 7 | 150534741 | G | A | 0.22 | 0.042  | 0.019 |
| rs10228796 | 7 | 15064190  | G | C | 0.55 | 0.160  | 0.015 |
| rs6946660  | 7 | 156948648 | C | T | 0.35 | -0.107 | 0.016 |
| rs11762413 | 7 | 2090387   | G | C | 0.25 | -0.085 | 0.018 |
| rs2188848  | 7 | 23884697  | G | A | 0.20 | -0.055 | 0.019 |
| rs860262   | 7 | 28194397  | A | C | 0.50 | -0.158 | 0.015 |
| rs917195   | 7 | 30728452  | T | C | 0.23 | -0.073 | 0.018 |
| rs730497   | 7 | 44223721  | A | G | 0.18 | 0.445  | 0.020 |
| rs73121277 | 7 | 50577968  | C | T | 0.28 | 0.084  | 0.017 |
| rs6975279  | 7 | 69649683  | A | C | 0.26 | 0.101  | 0.018 |
| rs6956980  | 7 | 89803634  | C | T | 0.53 | 0.083  | 0.015 |
| rs7834323  | 8 | 10671984  | C | T | 0.29 | -0.074 | 0.017 |
| rs727582   | 8 | 116650468 | G | A | 0.34 | -0.093 | 0.016 |
| rs13266634 | 8 | 118184783 | T | C | 0.31 | -0.277 | 0.017 |
| rs12056338 | 8 | 12643055  | T | G | 0.42 | 0.050  | 0.016 |
| rs17772814 | 8 | 128711742 | A | G | 0.08 | -0.099 | 0.029 |
| rs1561927  | 8 | 129568078 | T | C | 0.73 | -0.048 | 0.017 |
| rs35753840 | 8 | 14148990  | C | A | 0.39 | 0.054  | 0.016 |
| rs13268508 | 8 | 145525277 | T | C | 0.38 | 0.087  | 0.016 |
| rs2953845  | 8 | 145972950 | T | C | 0.55 | 0.042  | 0.015 |
| rs6558173  | 8 | 22492103  | T | G | 0.35 | 0.039  | 0.016 |
| rs2725370  | 8 | 30852826  | C | T | 0.70 | -0.049 | 0.017 |
| rs57735787 | 8 | 34438332  | G | A | 0.25 | -0.042 | 0.018 |
| rs13262861 | 8 | 41508577  | A | C | 0.17 | -0.121 | 0.021 |
| rs7813865  | 8 | 57506937  | C | T | 0.29 | 0.041  | 0.017 |
| rs10101067 | 8 | 72407374  | C | G | 0.08 | 0.092  | 0.029 |
| rs28792187 | 8 | 74568099  | G | A | 0.07 | 0.123  | 0.030 |
| rs1895874  | 8 | 95675372  | A | G | 0.50 | 0.048  | 0.015 |

|            |   |           |   |   |      |        |       |
|------------|---|-----------|---|---|------|--------|-------|
| rs10808671 | 8 | 95967372  | G | A | 0.53 | -0.073 | 0.015 |
| rs60384372 | 8 | 9974584   | G | A | 0.47 | -0.056 | 0.015 |
| rs1567353  | 9 | 1033773   | G | C | 0.31 | 0.035  | 0.017 |
| rs10119430 | 9 | 111938268 | A | G | 0.79 | -0.054 | 0.019 |
| rs1431819  | 9 | 116943357 | G | A | 0.70 | 0.038  | 0.017 |
| rs10818763 | 9 | 125689694 | T | C | 0.13 | -0.108 | 0.023 |
| rs10739629 | 9 | 126093422 | T | C | 0.51 | -0.036 | 0.015 |
| rs529565   | 9 | 136149500 | C | T | 0.32 | 0.164  | 0.017 |
| rs28642213 | 9 | 139248082 | G | A | 0.75 | 0.169  | 0.018 |
| rs12380322 | 9 | 19074538  | G | A | 0.39 | 0.051  | 0.016 |
| rs10965247 | 9 | 22132729  | G | A | 0.18 | -0.302 | 0.020 |
| rs7018475  | 9 | 22137685  | G | T | 0.26 | 0.178  | 0.018 |
| rs2150854  | 9 | 28411949  | T | G | 0.33 | 0.072  | 0.016 |
| rs4237150  | 9 | 4290085   | C | G | 0.40 | 0.091  | 0.016 |
| rs67269808 | 9 | 81907986  | G | A | 0.06 | -0.130 | 0.032 |
| rs2796441  | 9 | 84308948  | A | G | 0.42 | -0.096 | 0.016 |
| rs7023781  | 9 | 96447178  | T | C | 0.27 | 0.058  | 0.017 |
| rs10993072 | 9 | 96915002  | T | C | 0.32 | 0.083  | 0.016 |
| rs28496034 | 9 | 98278332  | G | C | 0.33 | -0.057 | 0.016 |

EAF: effect allele frequency; SE: standard error; SNP: single nucleotide polymorphism.

**Table S6. Weighted median sensitivity analyses for the association of genetically proxied glucagon-like peptide receptor (GLP1R) agonism and glycemic control more generally with heart failure (HF; 47,309 cases / 930,014 controls) and left ventricular ejection fraction (LVEF;  $n=16,923$ ).**

| <b>Exposure</b> | <b>Outcome</b> | <b>N SNPs</b> | <b>Effect units</b> | <b>Effect</b>      | <b>P value</b> |
|-----------------|----------------|---------------|---------------------|--------------------|----------------|
| GLP1R           | HF             | 3             | Odds ratio          | 0.77 [0.62, 0.96]  | 0.02           |
| Glycemia        | HF             | 350           | Odds ratio          | 0.98 [0.96, 1.00]  | 0.04           |
| GLP1R           | LVEF           | 3             | SD change in LVEF   | 0.18 [-0.07, 0.42] | 0.16           |
| Glycemia        | LVEF           | 334           | SD change in LVEF   | 0.00 [-0.02, 0.02] | 0.89           |

SD: standard deviation; SNP: single-nucleotide polymorphism.

**Figure S1. Scatter plot displaying genetic associations of the GLP1R genetic proxies with glycated hemoglobin (mmol/mol, x-axis) and heart failure risk (log-odds, y-axis).**

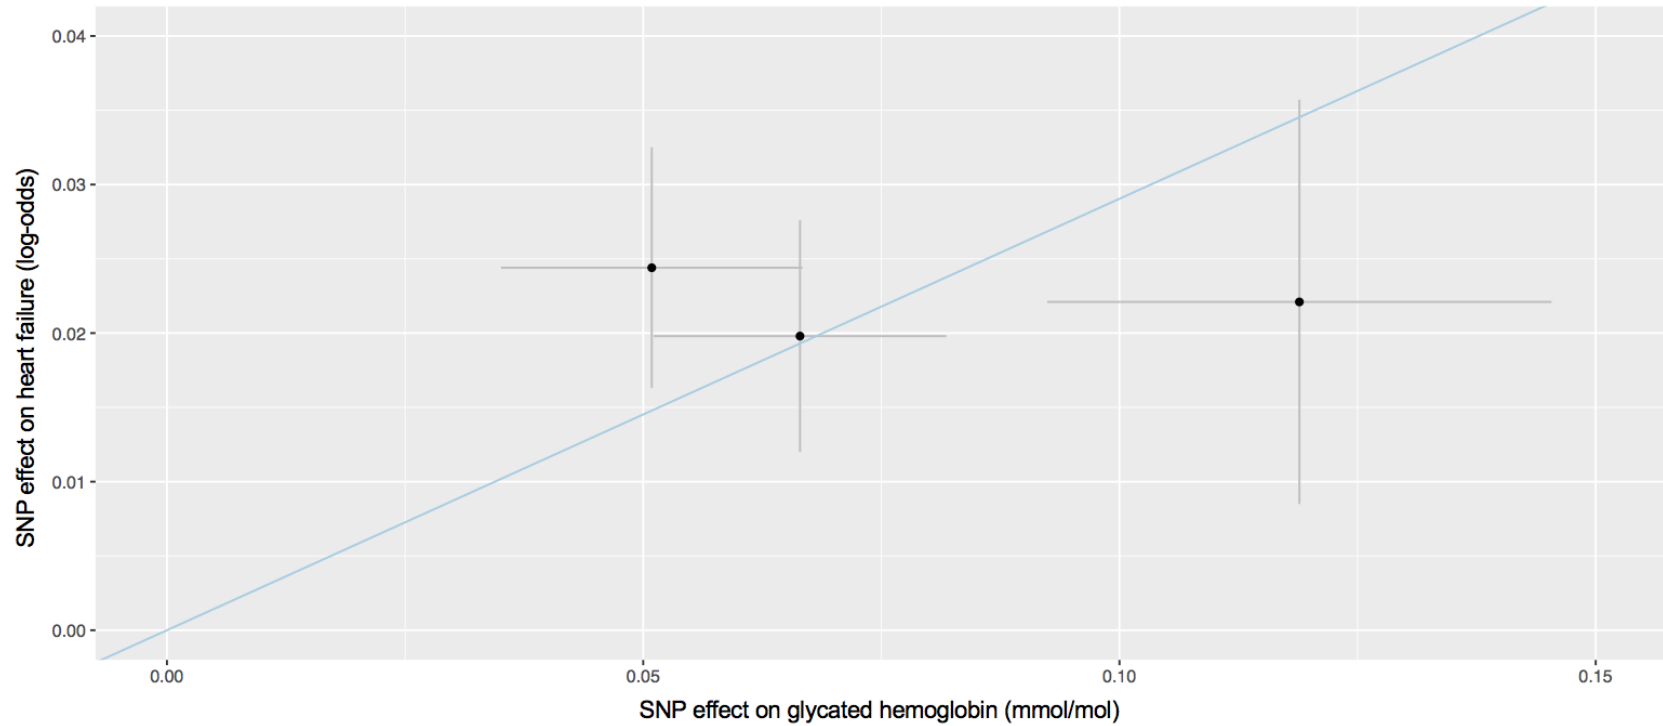

Each point represents a single genetic variant, with vertical and horizontal lines representing standard errors. The slope of the blue diagonal line represents the inverse-variance weighted Mendelian randomization estimate. The *P* value for the Cochran Q test for heterogeneity was 0.32. SNP: single-nucleotide polymorphism.

**Figure S2. Scatter plot displaying genetic associations of the GLP1R genetic proxies with type 2 diabetes liability (log-odds, x-axis) and heart failure risk (log-odds, y-axis).**

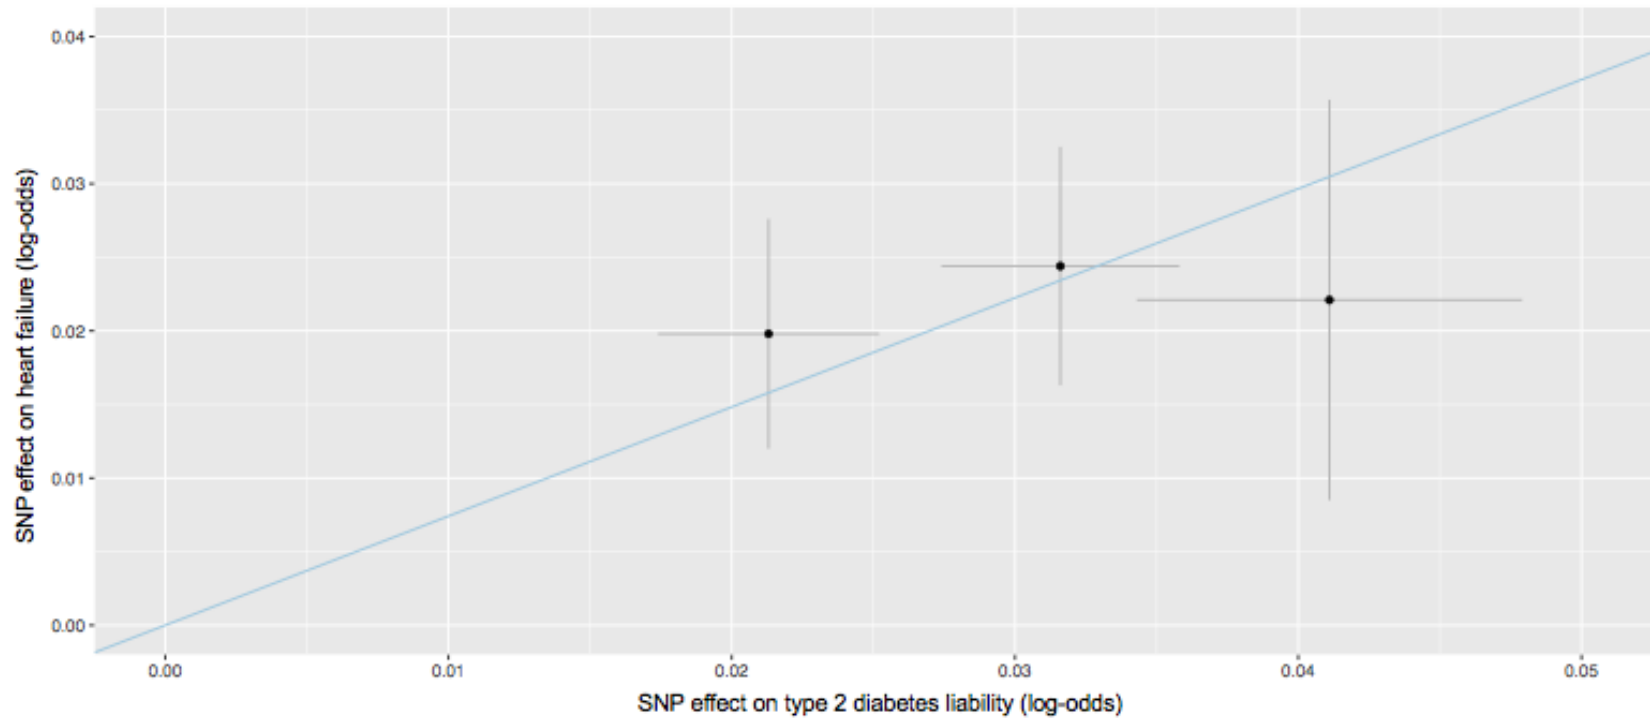

Each point represents a single genetic variant, with vertical and horizontal lines representing standard errors. The slope of the blue diagonal line represents the inverse-variance weighted Mendelian randomization estimate. The *P* value for the Cochran Q test for heterogeneity was 0.72. SNP: single-nucleotide polymorphism.

**Figure S3. Scatter plot displaying genetic associations of the GLP1R genetic proxies with glycated hemoglobin (mmol/mol, x-axis) and left ventricular ejection fraction (standard deviation units, y-axis).**

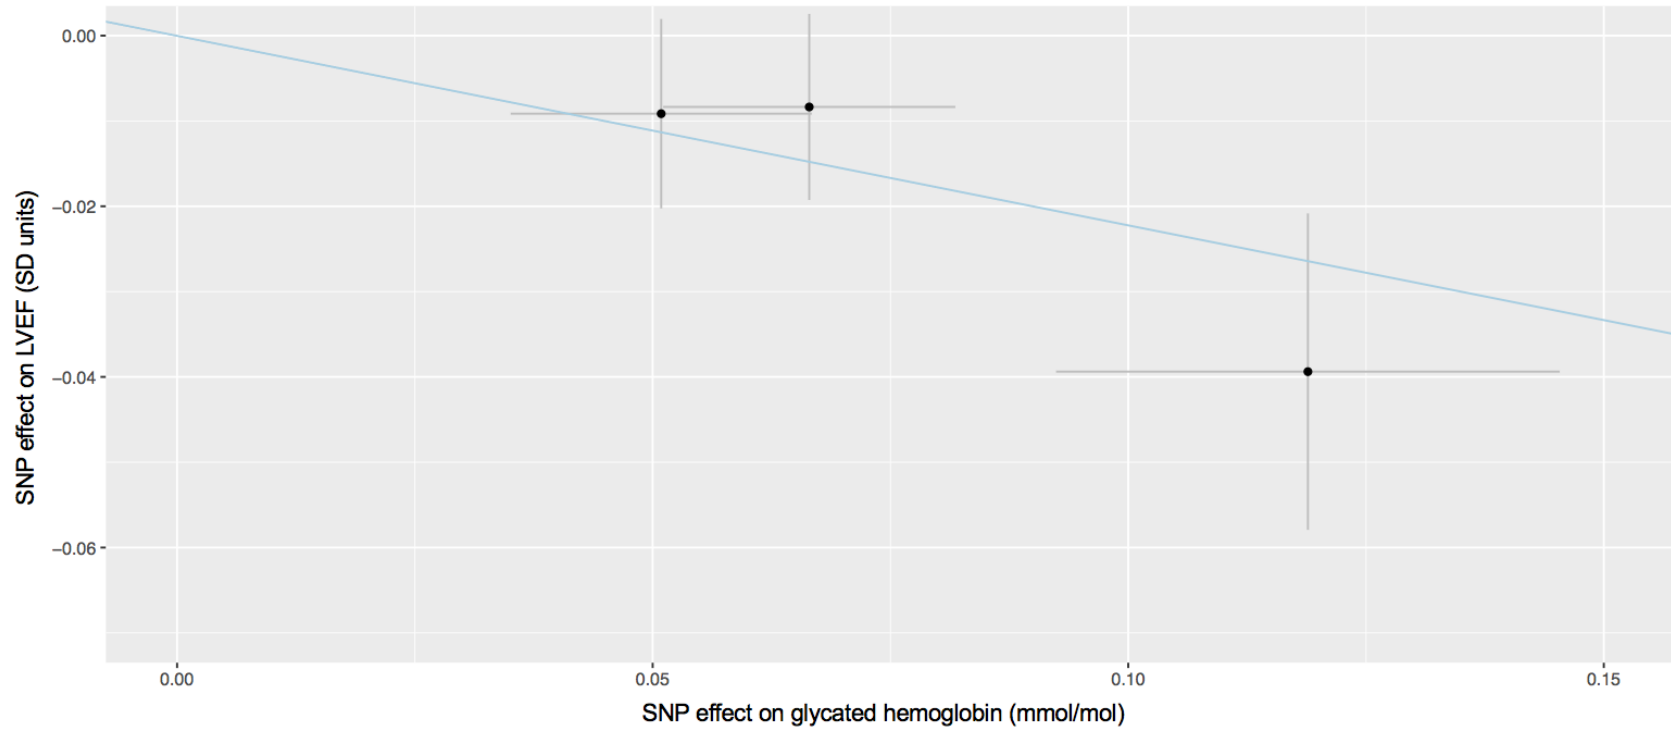

Each point represents a single genetic variant, with vertical and horizontal lines representing standard errors. The slope of the blue diagonal line represents the inverse-variance weighted Mendelian randomization estimate. The *P* value for the Cochran Q test for heterogeneity was 0.65. SNP: single-nucleotide polymorphism.

**Figure S4. Scatter plot displaying genetic associations of the glycemia genetic proxies with glycated hemoglobin (mmol/mol, x-axis) and heart failure risk (log-odds, y-axis).**

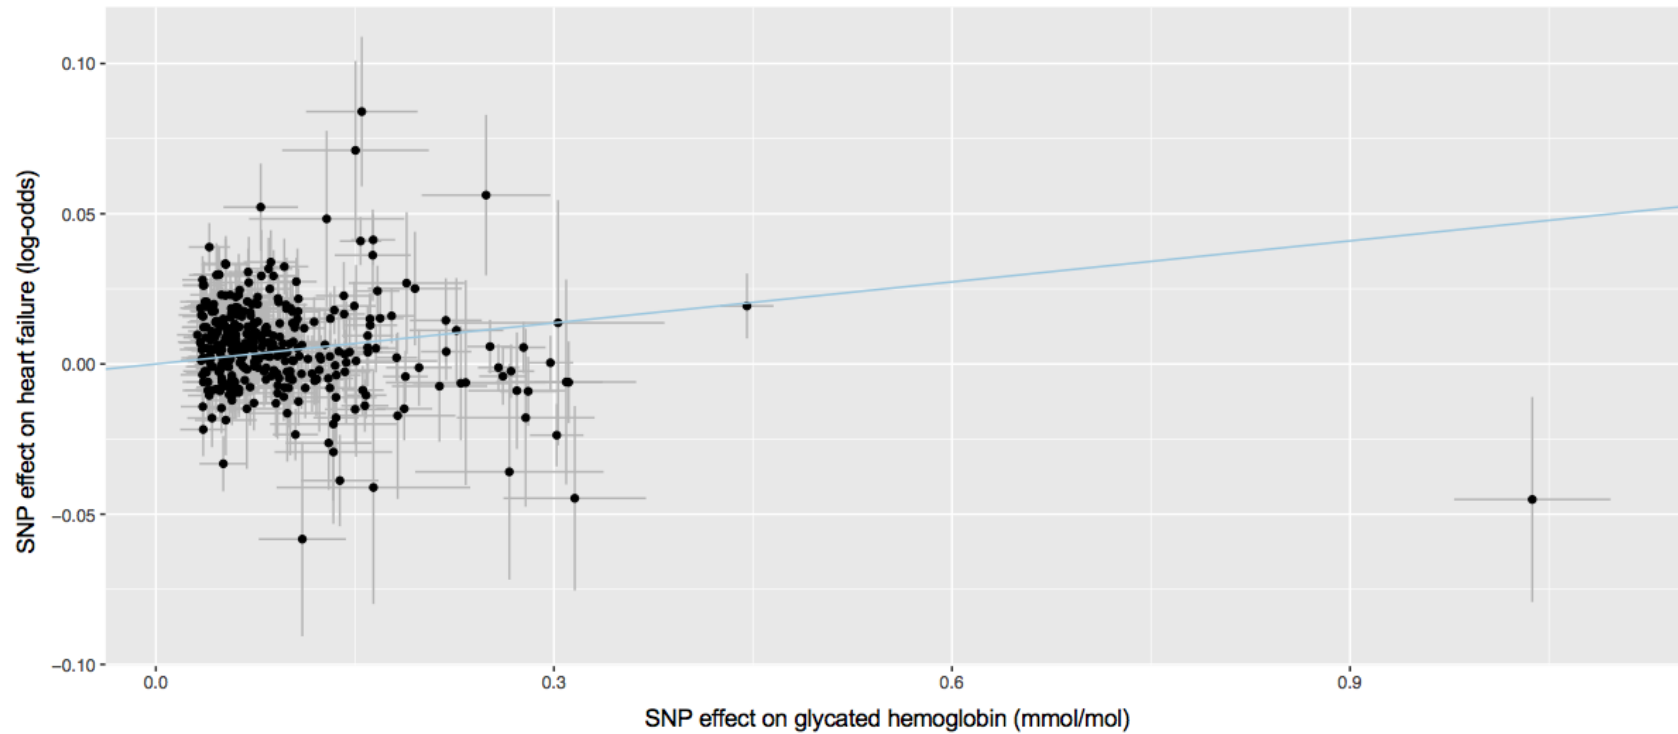

Each point represents a single genetic variant, with vertical and horizontal lines representing standard errors. The slope of the blue diagonal line represents the inverse-variance weighted Mendelian randomization estimate. SNP: single-nucleotide polymorphism.



**Figure S5. Scatter plot displaying genetic associations of the glycemia genetic proxies with glycated hemoglobin (mmol/mol, x-axis) and left ventricular ejection fraction (standard deviation units, y-axis).**

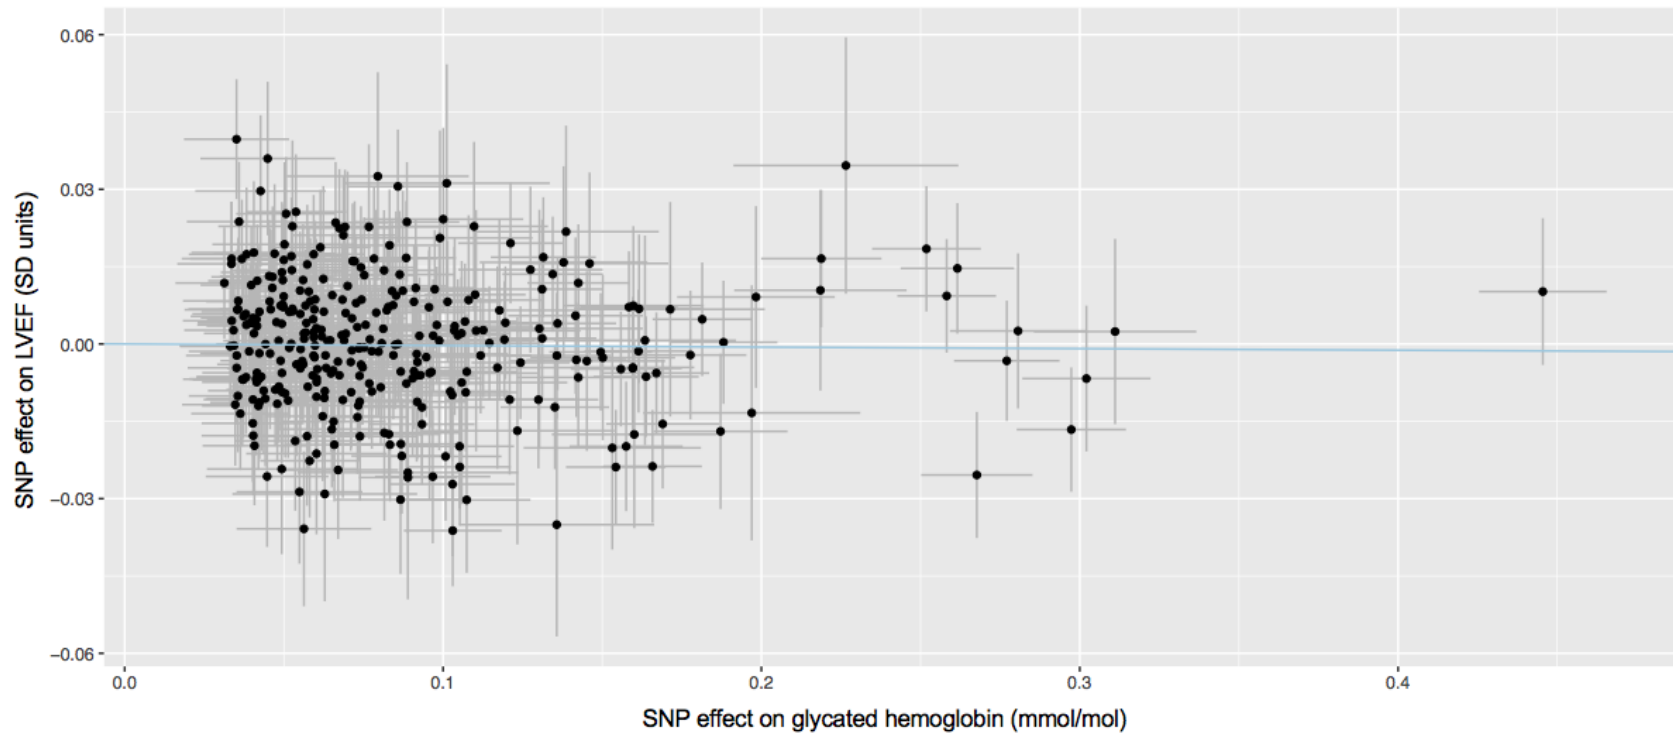

Each point represents a single genetic variant, with vertical and horizontal lines representing standard errors. The slope of the blue diagonal line represents the inverse-variance weighted Mendelian randomization estimate. SNP: single-nucleotide polymorphism.
